# Supplementary material for: Antioxidative Properties of Baltic Sea Keystone Macroalgae (Fucus vesiculosus, Phaeophyceae) under Ocean Warming and Acidification in a Seasonally Varying Environment
Source: MDPI journal article supplement (doi:10.3390/biology10121330), 2021-12-15
Supplement: s1 [file s1]

## Supplement

**Table S1** Photosynthetically active radiation (PAR) at the surface, dissolved inorganic nitrogen (DIN) in the Kiel Fjord as well as mean, minimum, and maximum Benthocosm temperatures in each month ( $n = 3$ , mean  $\pm$  SD).

|                |           | PAR<br>( $\mu\text{mol m}^{-2} \text{s}^{-1}$ ) | DIN<br>( $\text{mg l}^{-1}$ ) | temperature in the Kiel Fjord ( $^{\circ}\text{C}$ ) |      |      | temperature in the Kiel Fjord<br>+5 $^{\circ}\text{C}$ |      |      |
|----------------|-----------|-------------------------------------------------|-------------------------------|------------------------------------------------------|------|------|--------------------------------------------------------|------|------|
|                |           | mean                                            | mean                          | mean $\pm$ SD                                        | min  | max  | mean $\pm$ SD                                          | min  | max  |
| Spring<br>2013 | April     | 327                                             | 0.1045                        | 8.2 $\pm$ 1.4                                        | 4.3  | 11.7 | 11.3 $\pm$ 1.1                                         | 9.0  | 18.4 |
|                | May       | 415                                             | 0.0774                        | 11.3 $\pm$ 2.1                                       | 6.1  | 17.4 | 15.4 $\pm$ 2.8                                         | 10.6 | 21.7 |
|                | June      | 641                                             | 0.0102                        | 16.1 $\pm$ 1.3                                       | 11.7 | 19.4 | 21.1 $\pm$ 1.3                                         | 15.5 | 23.7 |
| Summer<br>2013 | July      | 616                                             | 0.0020                        | 20.4 $\pm$ 1.8                                       | 14.8 | 24.1 | 25.0 $\pm$ 2.5                                         | 16.6 | 29.0 |
|                | August    | 516                                             | 0.0312                        | 19.5 $\pm$ 1.2                                       | 14.7 | 24.8 | 24.5 $\pm$ 1.1                                         | 19.5 | 30.0 |
|                | September | 315                                             | 0.0251                        | 17.4 $\pm$ 1.0                                       | 13.3 | 19.6 | 22.4 $\pm$ 1.0                                         | 18.3 | 24.7 |
| Autumn<br>2013 | October   | 139                                             | 0.0227                        | 13.1 $\pm$ 0.5                                       | 11.6 | 14.6 | 17.7 $\pm$ 0.9                                         | 12.7 | 19.0 |
|                | November  | 78                                              | 0.1941                        | 10.3 $\pm$ 1.6                                       | 7.2  | 13.1 | 15.2 $\pm$ 1.6                                         | 12.1 | 18.1 |
|                | December  | 36                                              | 0.3294                        | 6.9 $\pm$ 0.5                                        | 5.5  | 9.5  | 11.8 $\pm$ 0.5                                         | 9.7  | 13.3 |
| Winter<br>2014 | January   | 68                                              | 0.2241                        | 4.2 $\pm$ 1.4                                        | 1.7  | 7    | 7.8 $\pm$ 1.3                                          | 5.4  | 10.6 |
|                | February  | 195                                             | 0.4984                        | 4.3 $\pm$ 0.7                                        | 2.3  | 6.3  | 8.4 $\pm$ 0.9                                          | 6.9  | 11.0 |
|                | March     | 263                                             | 0.1923                        | 6.7 $\pm$ 1.1                                        | 4.4  | 9.1  | 11.5 $\pm$ 1.2                                         | 7.8  | 14.4 |

**Table S2** Summary of mean monthly seawater carbonate chemistry.  $p\text{CO}_2$  ( $n = 3$ ,  $\pm$  SD) was calculated from total alkalinity (TA,  $n = 3$ ), dissolved organic carbon (DIC,  $n = 3$ ) and pH on total scale ( $n = 3$ ) measurements of seawater corresponding to each treatment (Wahl et al. 2015 [62], M. Böttcher and V. Winde pers. comm.).

|                        |                |                         | Spring 2013 |            |           | Summer 2013 |           |           | Autumn 2013 |           |           | Winter 2014 |           |           |
|------------------------|----------------|-------------------------|-------------|------------|-----------|-------------|-----------|-----------|-------------|-----------|-----------|-------------|-----------|-----------|
|                        |                |                         | April       | May        | June      | July        | August    | September | October     | November  | December  | January     | February  | March     |
| Ambient                | pH             |                         | 8.60±0.11   | 8.14±0.40  | 8.13±0.39 | 8.07±0.19   | 7.83±0.11 | 7.78±0.12 | 7.84±0.09   | 7.84±0.08 | 7.74±0.05 | 7.83±0.07   | 7.89±0.08 | 7.95±0.14 |
|                        | $p\text{CO}_2$ | ppm                     | 130±57      | 516±413    | 606±390   | 489±228     | 772±254   | 886±284   | 723±159     | 719±163   | 877±71    | 718±113     | 636±85    | 587±219   |
|                        | TA             | $\mu\text{mol kg}^{-1}$ | 2066±82     | 2007±69    | 2059±91   | 1971±38     | 1906±103  | 1901±38   | 1968±33     | 2058±57   | 2077±14   | 2223±44     | 2173±12   | 2142±55   |
|                        | DIC            | $\mu\text{mol kg}^{-1}$ | 1731        | 1818       | 1917      | 1927        | 1849      | 1890      | 1950        | 2054      | 2033      | 2208        | 2070      | 2201      |
| +CO <sub>2</sub>       | pH             |                         | 8.33±0.16   | 7.93 ±0.39 | 7.82±0.43 | 7.87±0.17   | 7.70±0.10 | 7.62±0.13 | 7.74±0.09   | 7.72±0.09 | 7.60±0.05 | 7.69±0.07   | 7.66±0.04 | 7.69±0.07 |
|                        | $p\text{CO}_2$ | ppm                     | 297±192     | 854±663    | 1244±815  | 786±320     | 1070±333  | 1313±397  | 924±198     | 927±212   | 1217±142  | 1066±57     | 1087±94   | 1061±210  |
|                        | TA             | $\mu\text{mol kg}^{-1}$ | 2069±87     | 2008±70    | 2069±87   | 1972±45     | 1916±112  | 1910±39   | 1979±39     | 2052±56   | 2086±17   | 2197±53     | 2174±10   | 2143±54   |
|                        | DIC            | $\mu\text{mol kg}^{-1}$ | 1991        | 1883       | 2013      | 1969        | 1883      | 1921      | 1970        | 2085      | 2071      | 2248        | 2178      | 2221      |
| +Temp                  | pH             |                         | 8.39±0.12   | 7.90±0.38  | 8.00±0.18 | 7.91 ±0.26  | 7.61±0.13 | 7.60±0.09 | 7.73±0.07   | 7.76±0.08 | 7.71±0.03 | 7.79±0.07   | 7.78±0.04 | 7.70±0.10 |
|                        | $p\text{CO}_2$ | ppm                     | 220±121     | 960±837    | 656±244   | 828±538     | 1414±531  | 1373±343  | 952±166     | 878±160   | 953±81    | 808±142     | 826±83    | 1074±313  |
|                        | TA             | $\mu\text{mol kg}^{-1}$ | 2067±85     | 2005±71    | 2051±93   | 1975±36     | 1921±100  | 1914±38   | 1979±31     | 2053±44   | 2081±18   | 2205±48     | 2166±9    | 2106±69   |
|                        | DIC            | $\mu\text{mol kg}^{-1}$ | 1929        | 1905       | 2069      | 1926        | 1876      | 1934      | 1956        | 2055      | 2034      | 2208        | 2122      | 2160      |
| +Temp +CO <sub>2</sub> | pH             |                         | 8.14±0.19   | 7.71±0.38  | 7.73±0.25 | 7.78±0.25   | 7.50±0.13 | 7.50±0.10 | 7.68±0.11   | 7.68±0.08 | 7.56±0.04 | 7.68±0.09   | 7.60±0.04 | 7.53±0.07 |
|                        | $p\text{CO}_2$ | ppm                     | 503±402     | 1200±947   | 1357±640  | 1385±809    | 1725±556  | 1490±885  | 1118±290    | 1092±202  | 1384±107  | 1071±215    | 1291±147  | 1585±263  |
|                        | TA             | $\mu\text{mol kg}^{-1}$ | 2095±89     | 2022±79    | 2059±85   | 1964±48     | 1905±108  | 1912±42   | 1976±44     | 2065±54   | 2077±8    | 2217±40     | 2168±13   | 2111±69   |
|                        | DIC            | $\mu\text{mol kg}^{-1}$ | 2050        | 1953       | 2119      | 1907        | 1959      | 1970      | 1978        | 2083      | 2073      | 2244        | 2164      | 2197      |

**Table S3** Initial superoxide dismutase (SOD) activity and total soluble protein (TSP) content of *Fucus vesiculosus* apices in its native habitat (initial,  $n = 12$ ) and after growing for 3 months in different seasons, temperature, and pCO<sub>2</sub> conditions in the Benthocosms ( $n = 3$ ). Seasons: spring: 04.04-19.06.2013; summer: 04.07-17.09.2013; autumn: 10.10-18.12.2013; winter: 16.01-01.04.2014. Temperature and pCO<sub>2</sub> conditions: +Temp +CO<sub>2</sub>: elevated temperature  $\Delta+5^{\circ}\text{C}$  with elevated pCO<sub>2</sub>, +Temp: elevated temperature  $\Delta+5^{\circ}\text{C}$  with *in situ* pCO<sub>2</sub>, +CO<sub>2</sub>: *in situ* Kiel Fjord temperature with elevated pCO<sub>2</sub>, Ambient: *in situ* Kiel Fjord temperature and pCO<sub>2</sub>. Values are means  $\pm$  SD (standard deviation). Cross (†) indicates dieback of *F. vesiculosus* in the summer experiment under warming.

|        |           |                        | SOD<br>(U g <sup>-1</sup> DM) | TSP<br>(mg g <sup>-1</sup> DM) |
|--------|-----------|------------------------|-------------------------------|--------------------------------|
| Spring | April     | Initial                | 67.0 $\pm$ 9.5                | 171.2 $\pm$ 33.0               |
|        |           | +Temp +CO <sub>2</sub> | 78.5 $\pm$ 9.4                | 56.1 $\pm$ 13.2                |
|        | June      | +Temp                  | 80.4 $\pm$ 2.8                | 73.5 $\pm$ 10.1                |
|        |           | +CO <sub>2</sub>       | 94.3 $\pm$ 13.0               | 53.0 $\pm$ 10.8                |
|        |           | Ambient                | 87.7 $\pm$ 10.3               | 65.1 $\pm$ 13.4                |
| Summer | July      | Initial                | 22.6 $\pm$ 16.2               | 25.3 $\pm$ 27.6                |
|        |           | +Temp +CO <sub>2</sub> | †                             | †                              |
|        | September | +Temp                  | †                             | †                              |
|        |           | +CO <sub>2</sub>       | 20.6 $\pm$ 2.0                | 20.6 $\pm$ 5.2                 |
|        |           | Ambient                | 15.7 $\pm$ 1.7                | 21.5 $\pm$ 0.7                 |
| Autumn | October   | Initial                | 38.6 $\pm$ 12.3               | 68.5 $\pm$ 35.6                |
|        |           | +Temp +CO <sub>2</sub> | 90.0 $\pm$ 16.3               | 53.8 $\pm$ 14.3                |
|        | December  | +Temp                  | 94.8 $\pm$ 16.0               | 65.0 $\pm$ 16.1                |
|        |           | +CO <sub>2</sub>       | 71.8 $\pm$ 19.8               | 60.7 $\pm$ 34.7                |
|        |           | Ambient                | 80.8 $\pm$ 14.9               | 59.3 $\pm$ 8.2                 |
| Winter | January   | Initial                | 84.5 $\pm$ 26.9               | 74.3 $\pm$ 30.4                |
|        |           | +Temp +CO <sub>2</sub> | 168.4 $\pm$ 57.2              | 31.4 $\pm$ 11.0                |
|        | April     | +Temp                  | 129.8 $\pm$ 15.7              | 46.3 $\pm$ 34.8                |
|        |           | +CO <sub>2</sub>       | 149.5 $\pm$ 30.6              | 71.3 $\pm$ 16.1                |
|        |           | Ambient                | 127.9 $\pm$ 11.9              | 76.8 $\pm$ 24.4                |

**Figure S1** (a) pH in the control (blue) and +CO<sub>2</sub> (red) experimental units of a tank with ambient temperature and in Kiel Fjord (*in situ*, black). (b) pH in the +Temp (blue) and +Temp +CO<sub>2</sub> (red) experimental units of a tank with increased temperature and in Kiel Fjord (*in situ*, black). Note that Kiel Fjord pH measurements prior to 30 May were taken at a shallower depth than the inlet of the flow-through. After that date pH in Kiel Fjord was measured close to the inlet (modified according to Wahl et al. 2015 [62]).

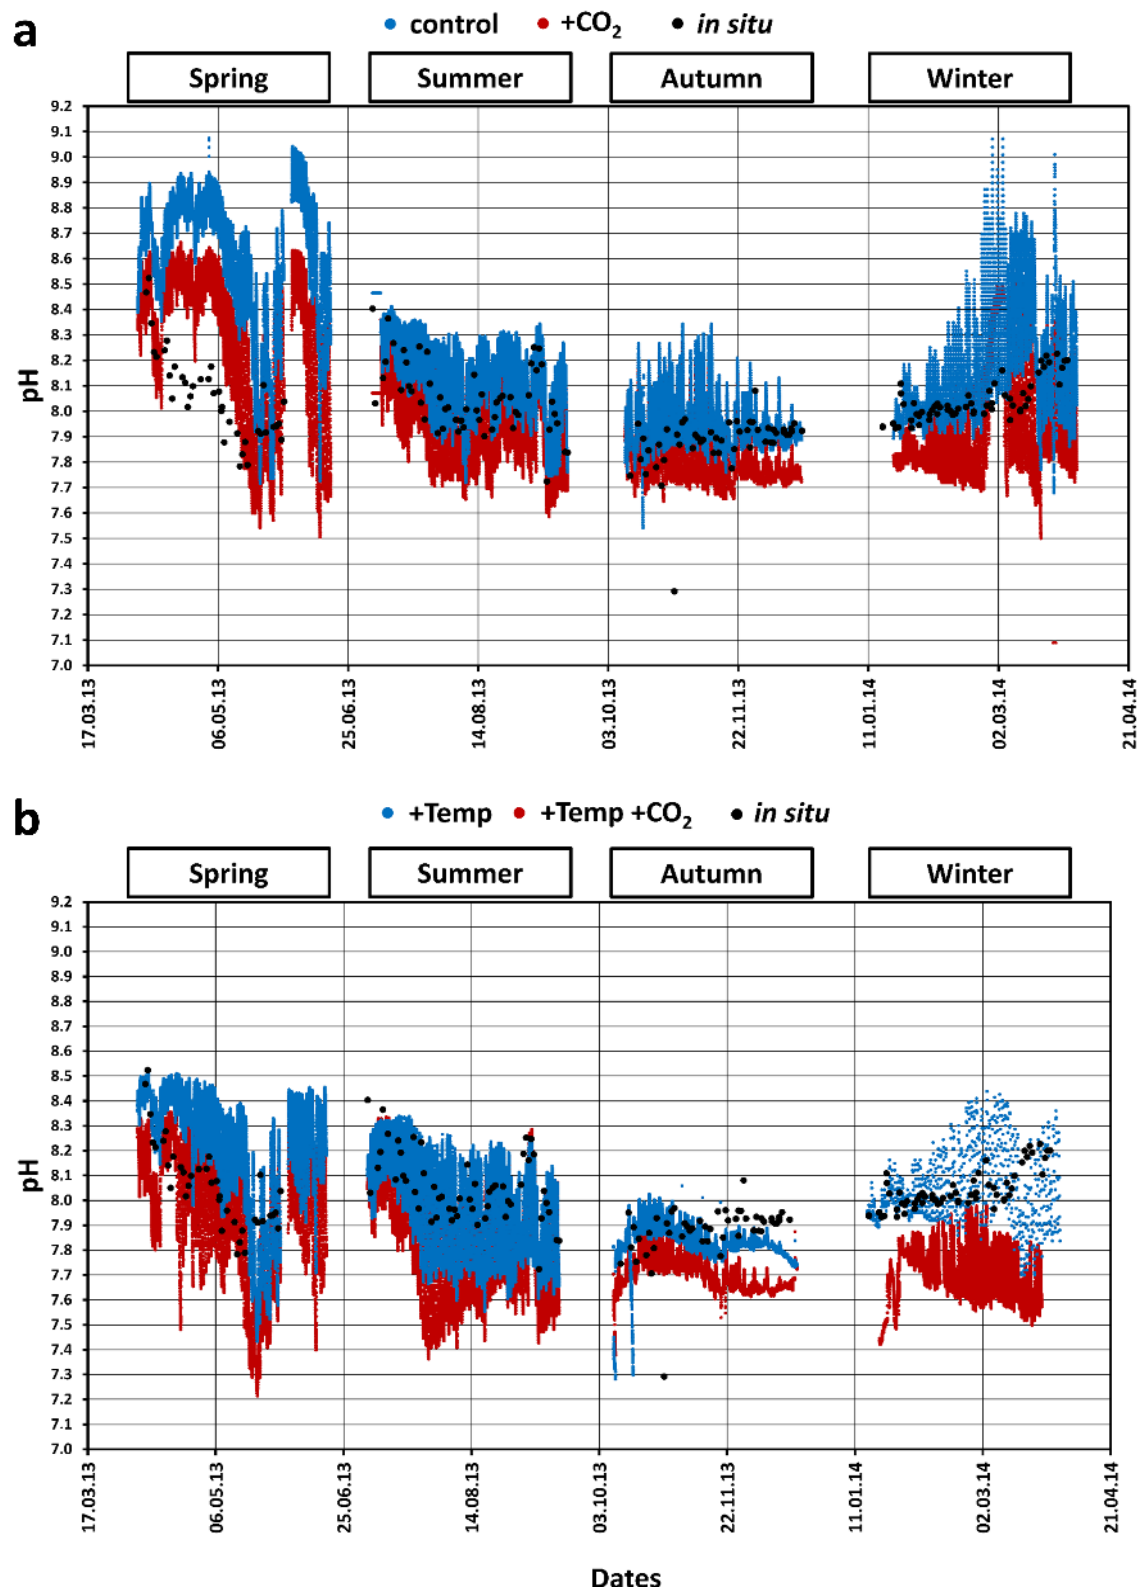

Figure S1
